# Supplementary material for: Cu superstructures fabricated using tree leaves and Cu–MnO2 superstructures for high performance supercapacitors
Source: Royal Society of Chemistry journal article supplement (doi:10.1039/c3ta10523g), 2013-01-01
Supplement: c3ta10523g.pdf [file c3ta10523g.pdf]

Electronic Supplementary Information (ESI)

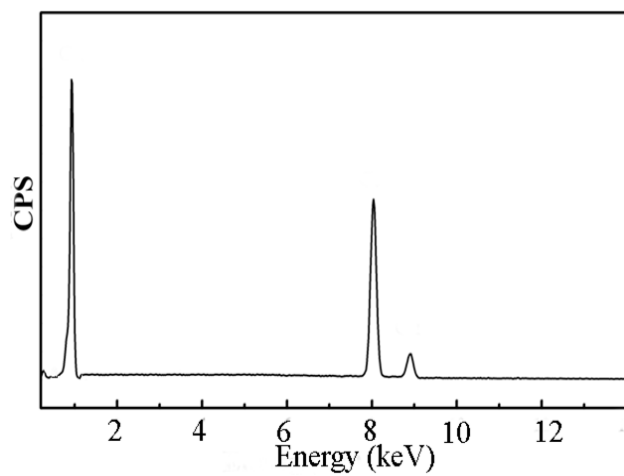

ESI Fig. 1 Energy dispersive x-ray spectrum of Cu superstructures (the product obtained using natural sapless leaves from magnolia grandiflora linn tree).

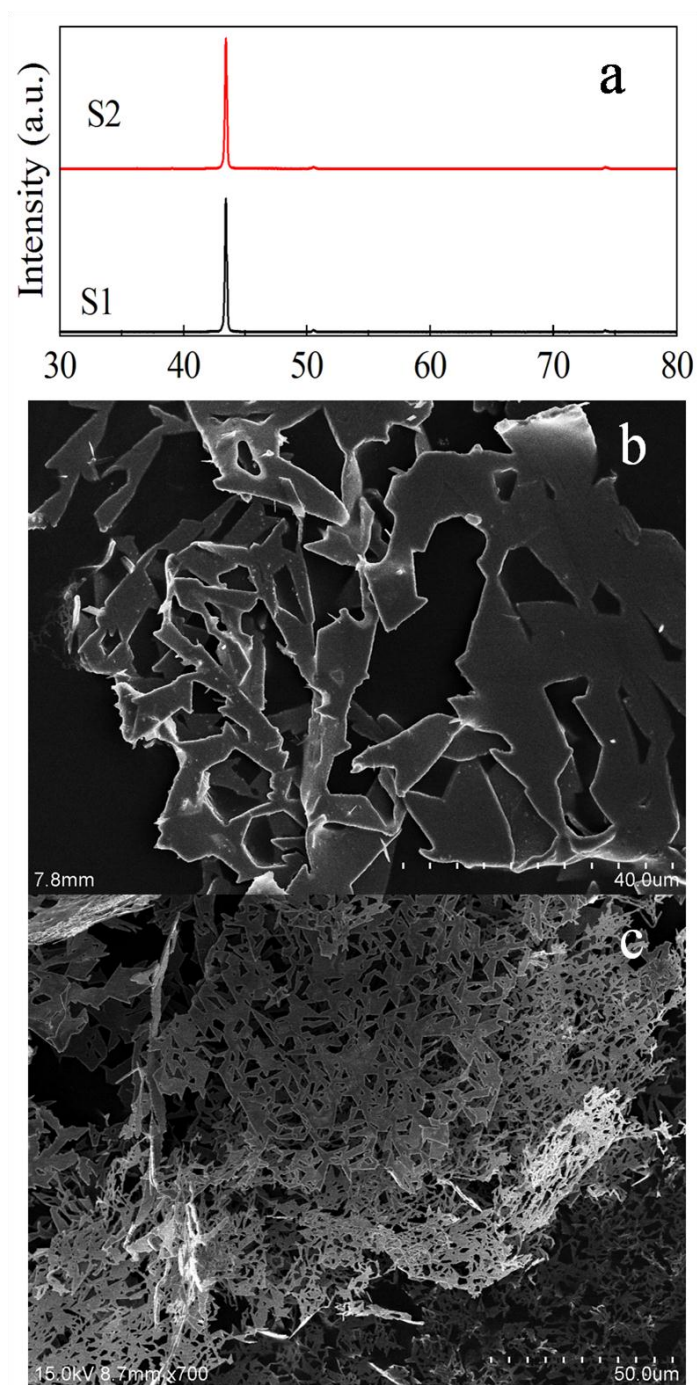

ESI Fig. 2 (a) XRD patterns of samples prepared by sapless leaves-S1 (phoenix tree) and S2 (maidenhair tree); (b) SEM image of S1; (c) SEM image of S2.

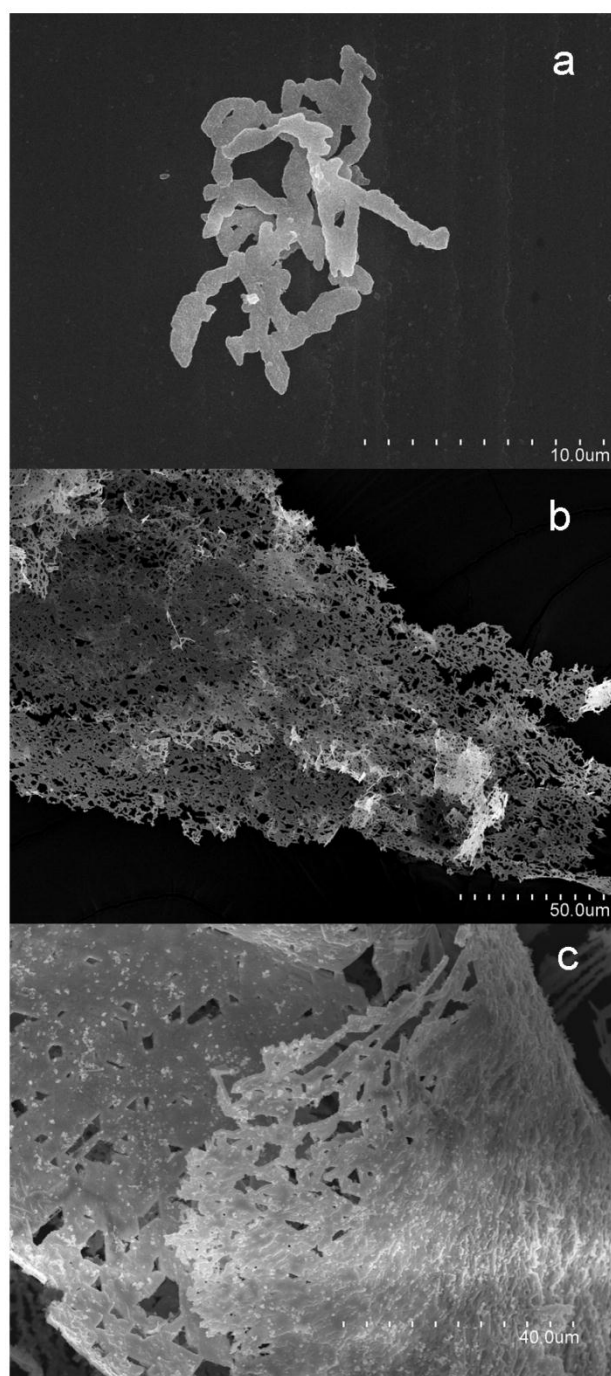

ESI Fig. 3 SEM images of the product obtained: 0.05 g natural sapless leaves (from *magnolia grandiflora* linn tree) and  $\text{CuSO}_4 \cdot 5\text{H}_2\text{O}$  (0.20 g) were mixed with 20 mL deionized water, maintained at 200 °C for different times: (a) 8 hours; (b) 24 hours; (c) 48 hours.

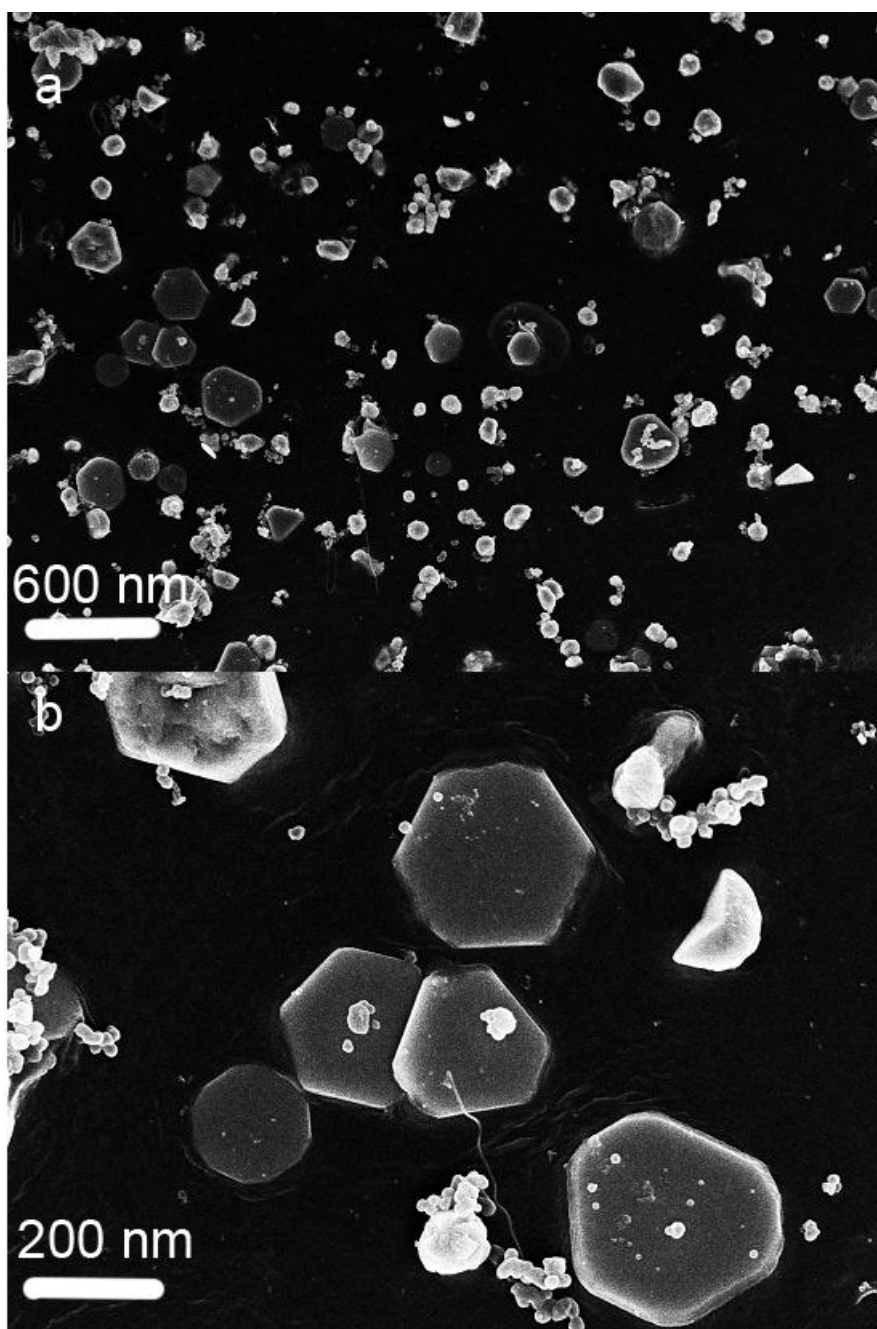

ESI Fig. 4 SEM images of the surface of leaves obtained: 0.05 g natural sapless leaves (from *magnolia grandiflora* linn tree) and  $\text{CuSO}_4 \cdot 5\text{H}_2\text{O}$  (0.20 g) were mixed with 20 mL deionized water, maintained at 200 °C for 8 hours.

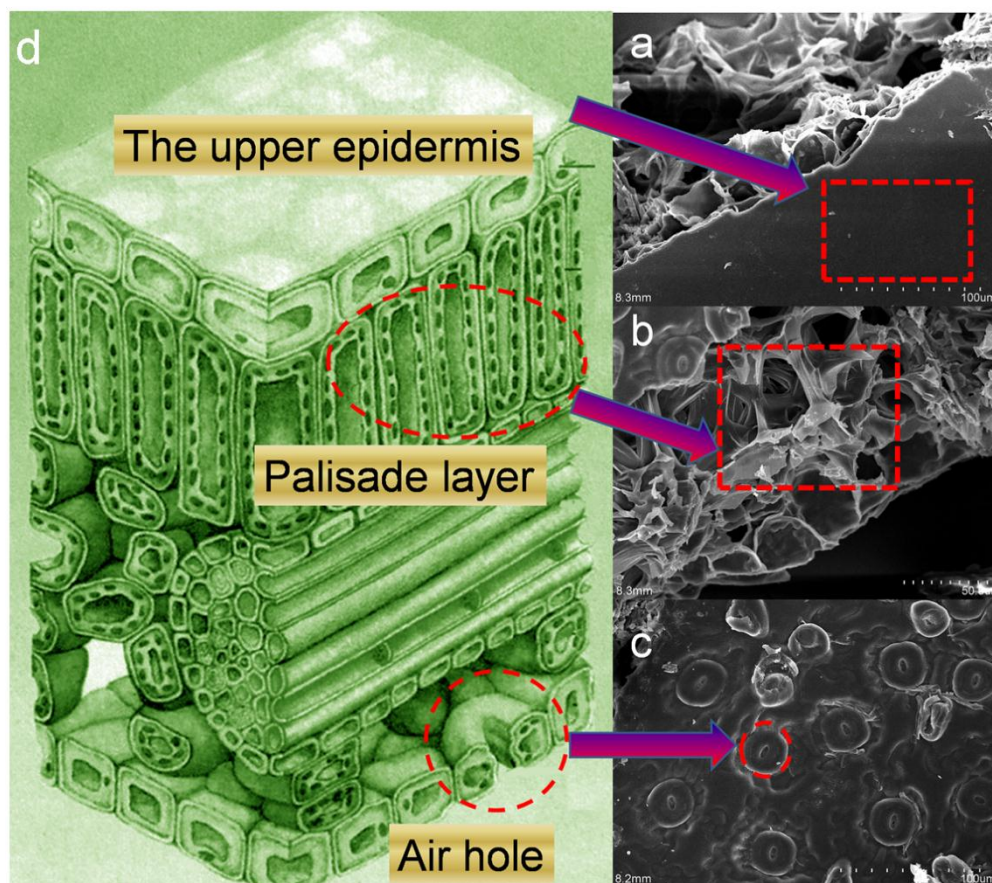

ESI Fig. 5 SEM images of natural sapless leaves from *magnolia grandiflora* linn tree:  
(a) The upper epidermis; (b) palisade layer; (c) air hole; (d) a simple scheme of leaves  
in microscale.

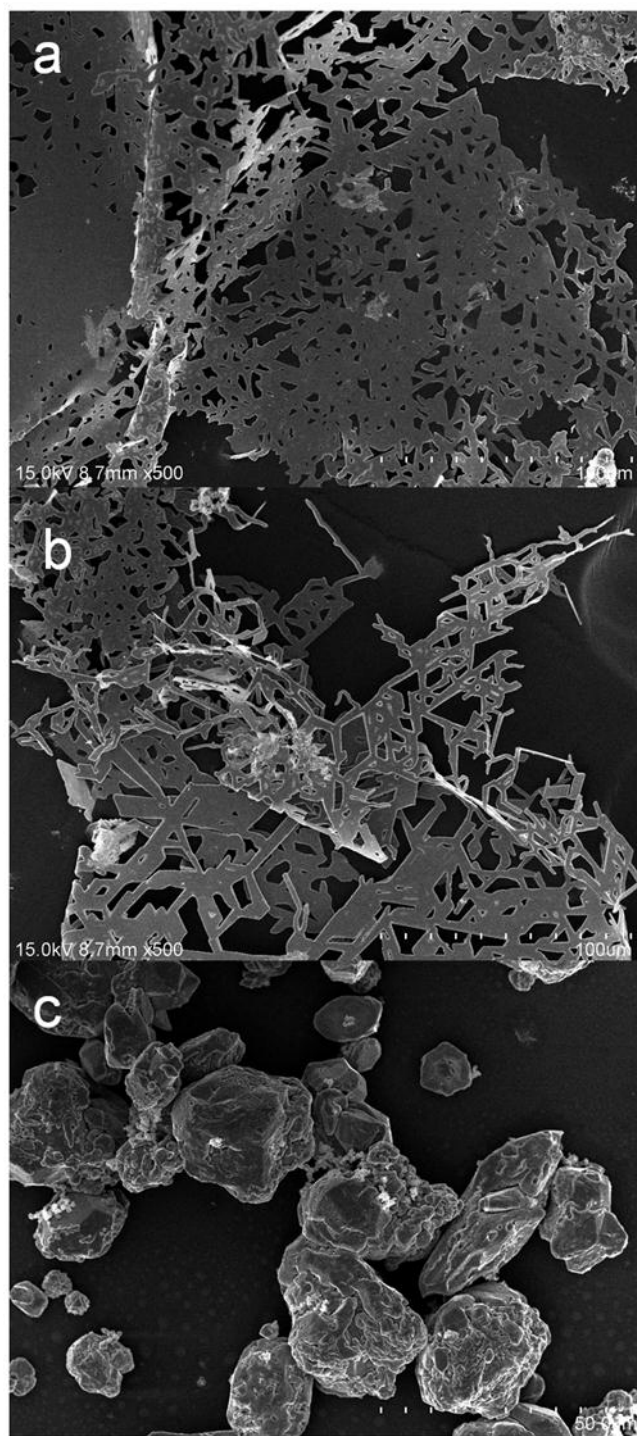

ESI Fig. 6 SEM images of the product obtained by utilization of the surplus leaves for different cycles (from 2 to 4 recycle) (a) The 2<sup>nd</sup> cycle; (b) The 3<sup>rd</sup> cycle; (d) The 4<sup>th</sup> cycle.

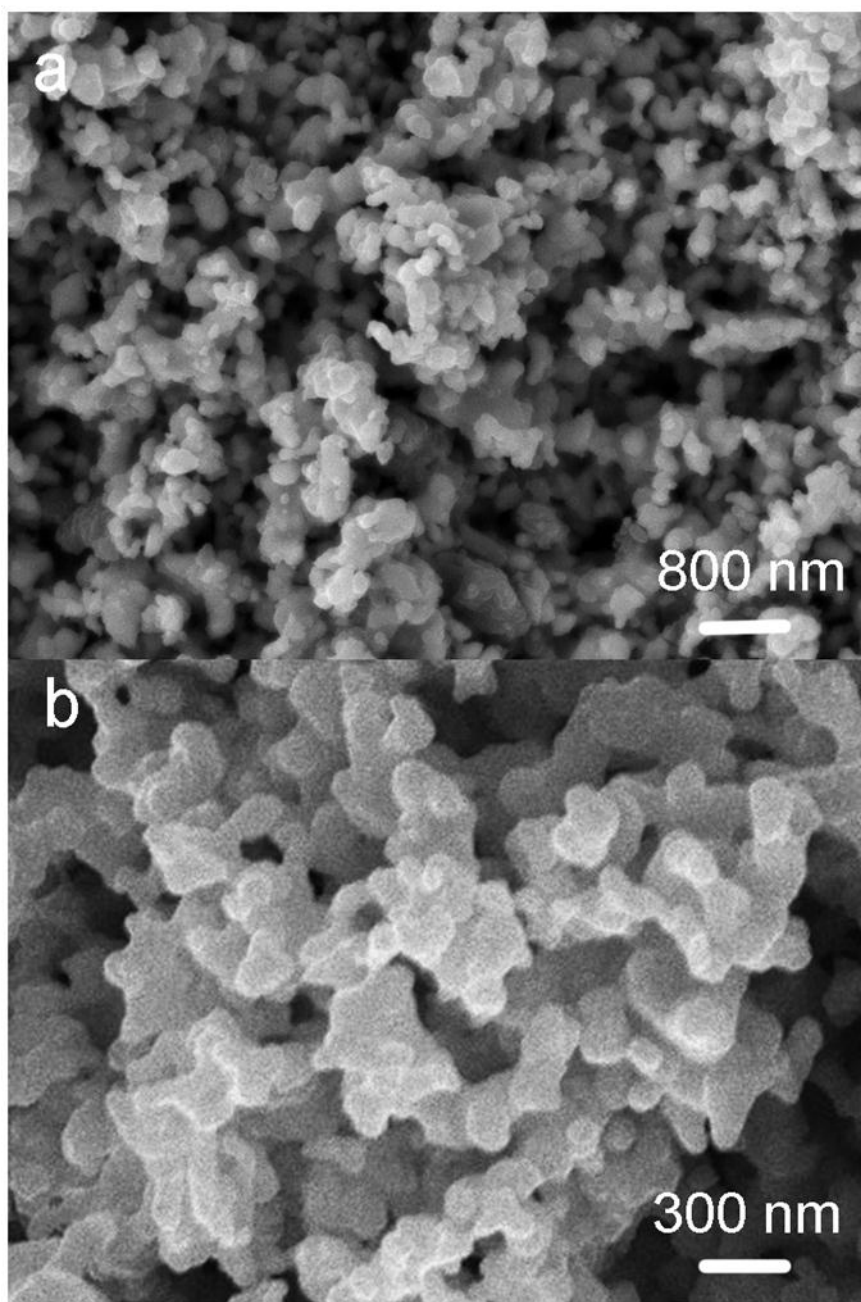

ESI Fig. 7 SEM images of MnO<sub>2</sub> particles.

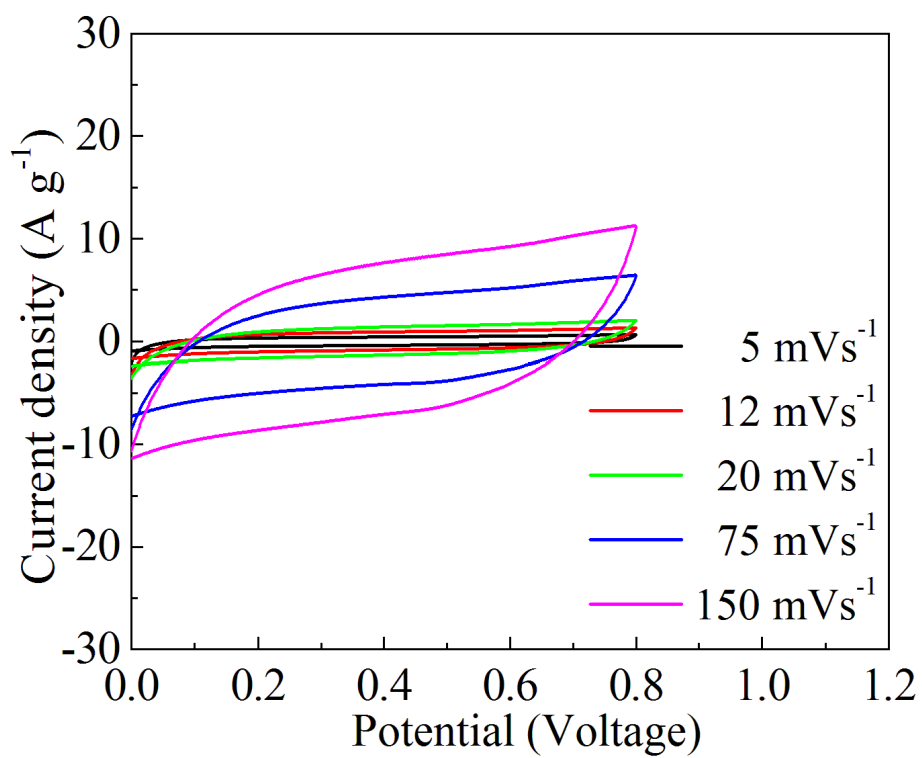

ESI Fig. 8 Cyclic voltammograms of MnO<sub>2</sub> nanoparticles electrodes at different scan rates.



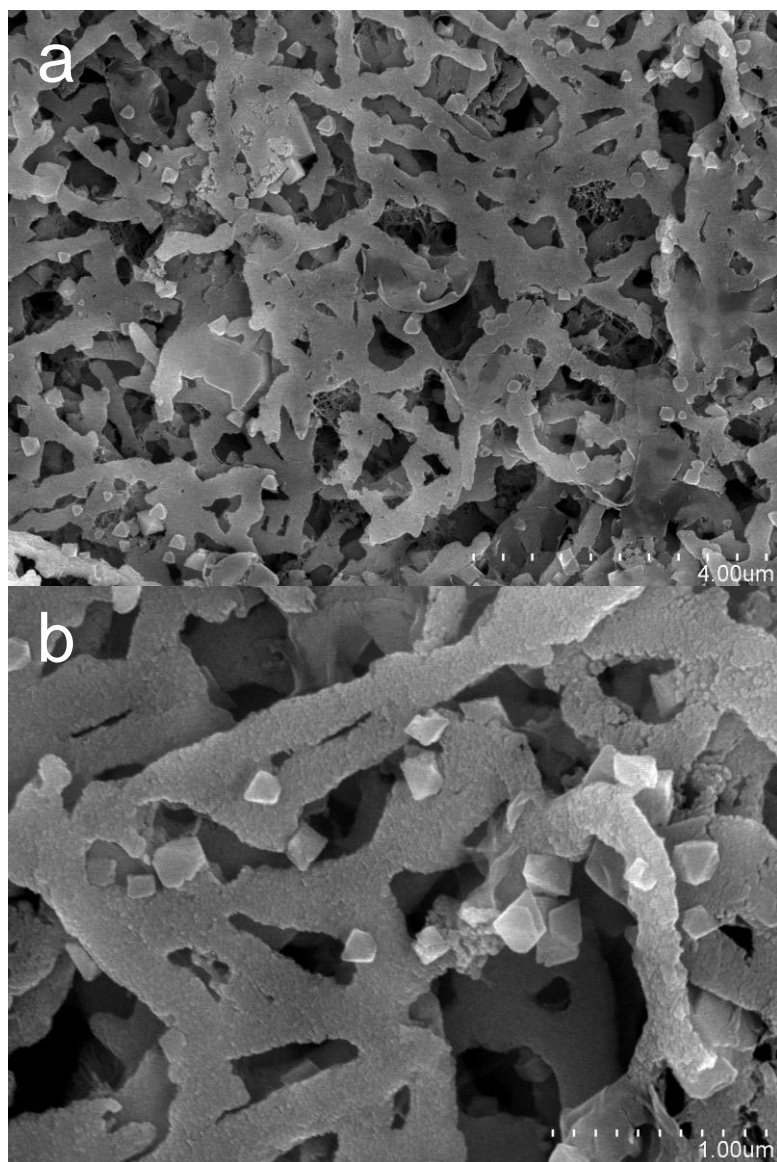

ESI Fig. 9 SEM images of Cu-MnO<sub>2</sub> composites after 2000 cycles.

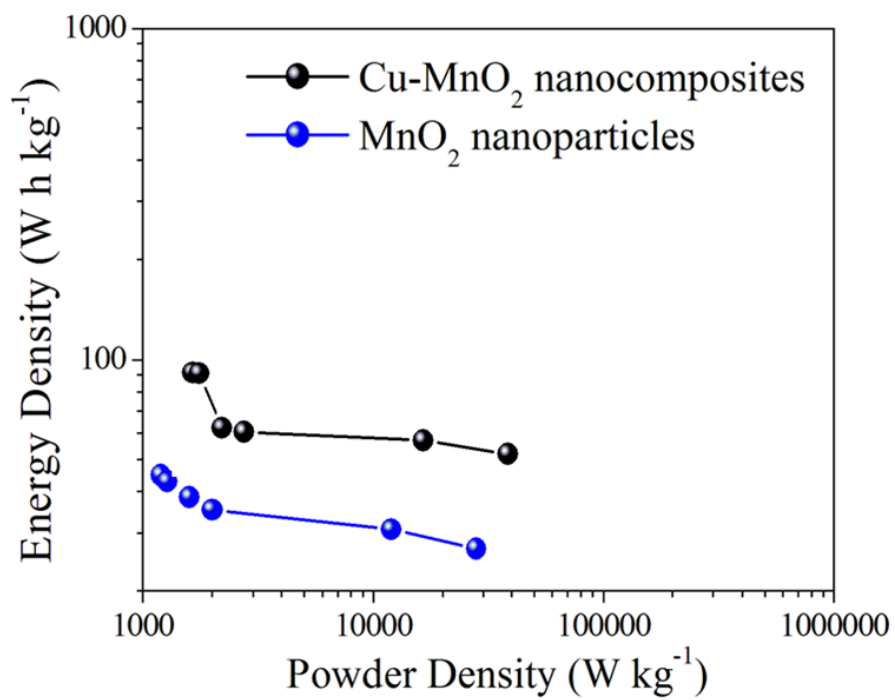

ESI Fig. 10 Ragone plot of estimated specific energy and specific power at various charge/discharge rates.

The working electrode was made from mixing of Cu-MnO<sub>2</sub> composite superstructures and PTFE (polytetrafluoroethylene) with a weight ratio of 95:5, coating on a piece of foamed nickel foam of about 1 cm<sup>2</sup>, and pressing it to be a thin foil at a pressure of 5.0 MPa. The weight of active sample is about 5 mg.

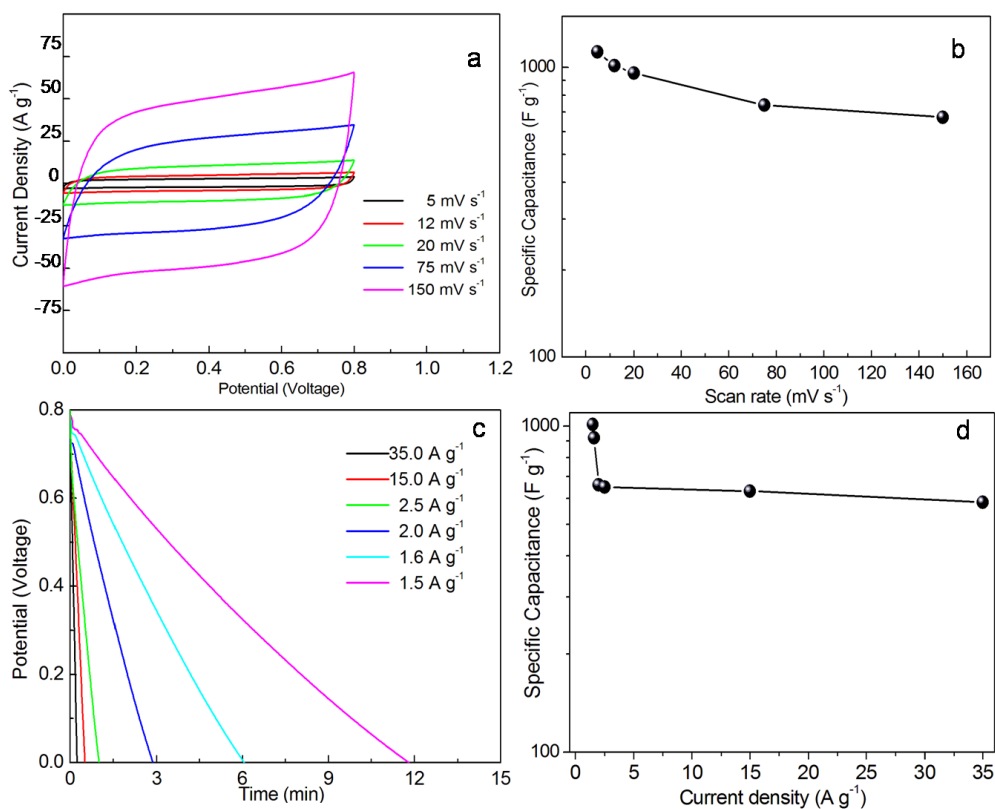

ESI Fig. 11 (a) Cyclic voltammetry (CV) curves from 0.0 to 0.80 V range at different scan rates from 5 to 150 mV s<sup>-1</sup> for the Cu-MnO<sub>2</sub> composite superstructures electrodes (*without any acetylene black*) in 1.0 M Na<sub>2</sub>SO<sub>4</sub> electrolyte under room temperature; (b) Specific capacitances derived from CV tests in a; (c) The galvanostatic discharge profiles of the Cu-MnO<sub>2</sub> composite superstructures at 1.5, 1.6, 2.0, 2.5, 15.0 and 35.0 A g<sup>-1</sup> current density in 1.0 M Na<sub>2</sub>SO<sub>4</sub> electrolyte under room temperature; (d) Specific capacitances derived from the discharge curves in c.

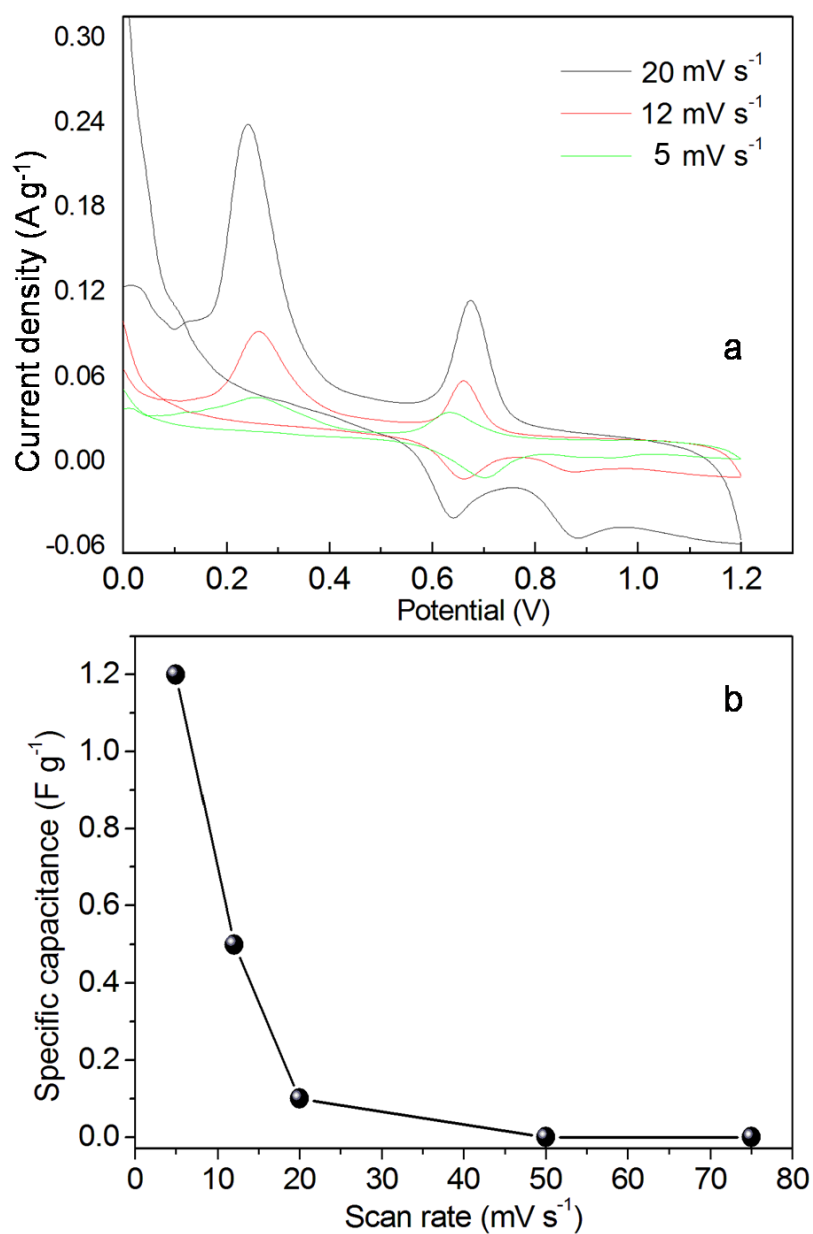

ESI Fig. 12 (a) Cyclic voltammetry (CV) curves from 0.0 to 0.80 V range at different scan rates 5, 12 and 20 mV s<sup>-1</sup> for Cu superstructures electrodes (*without any acetylene black*) in 1.0 M Na<sub>2</sub>SO<sub>4</sub> electrolyte under room temperature; (b) Specific capacitances derived from CV tests in a.

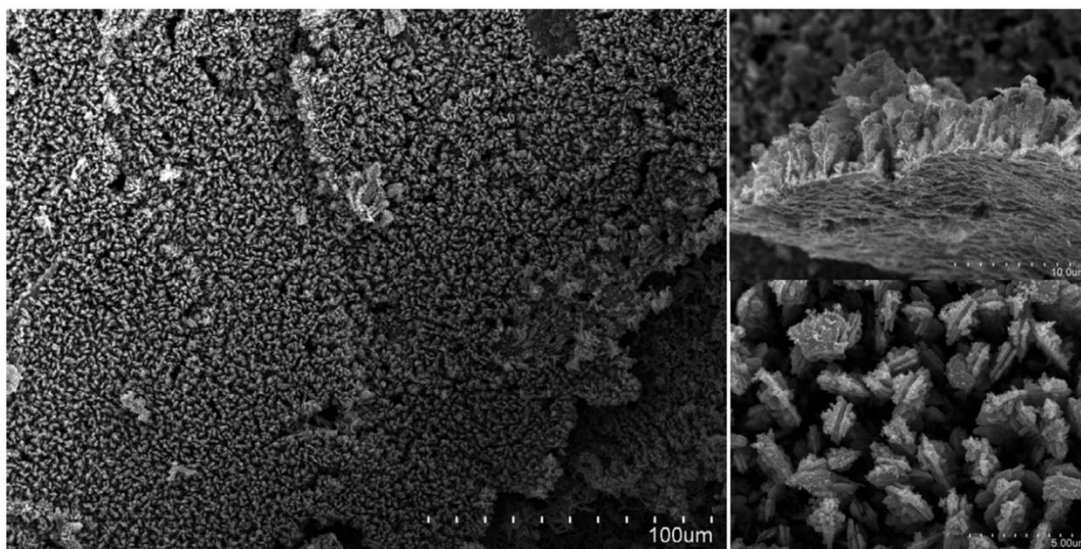

ESI Fig. 13 SEM images of  $\text{Cu}_2\text{S}$  nanoflowers arrays on Cu superstructures

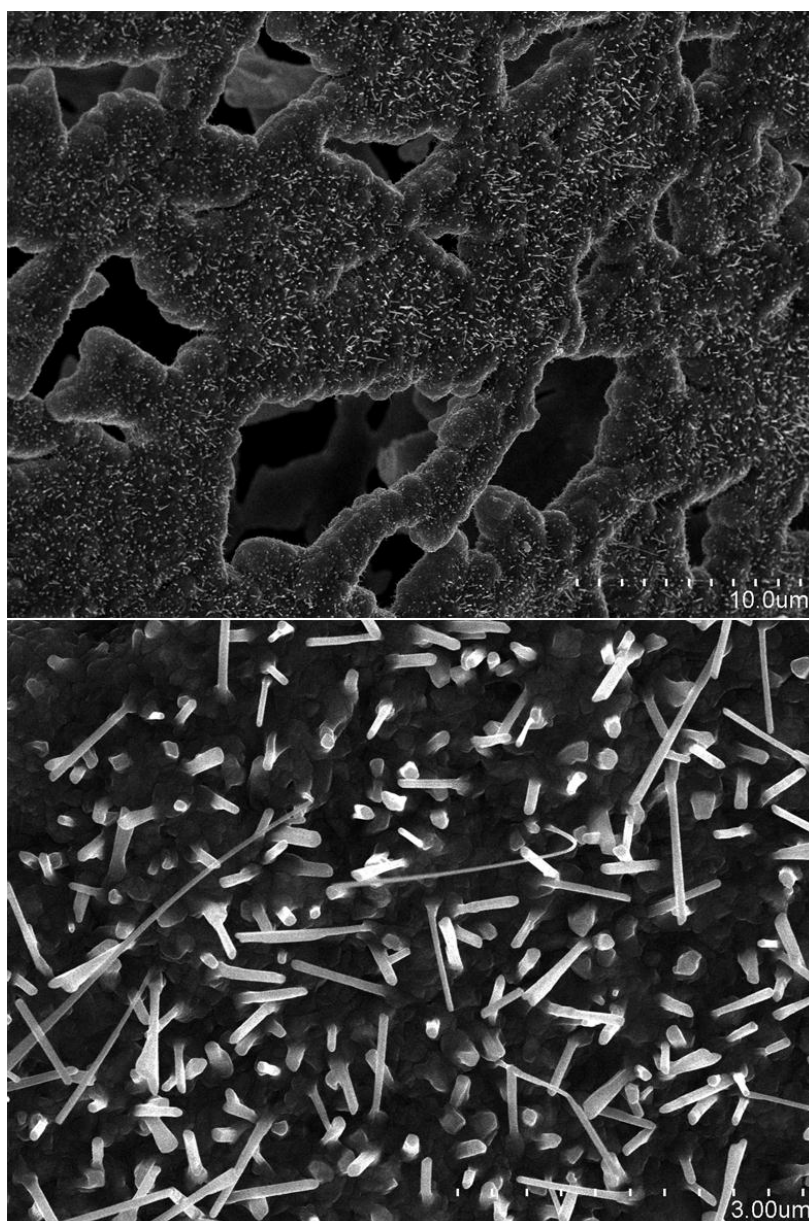

ESI Fig. 14 SEM images of CuO nanorods arrays on Cu superstructures

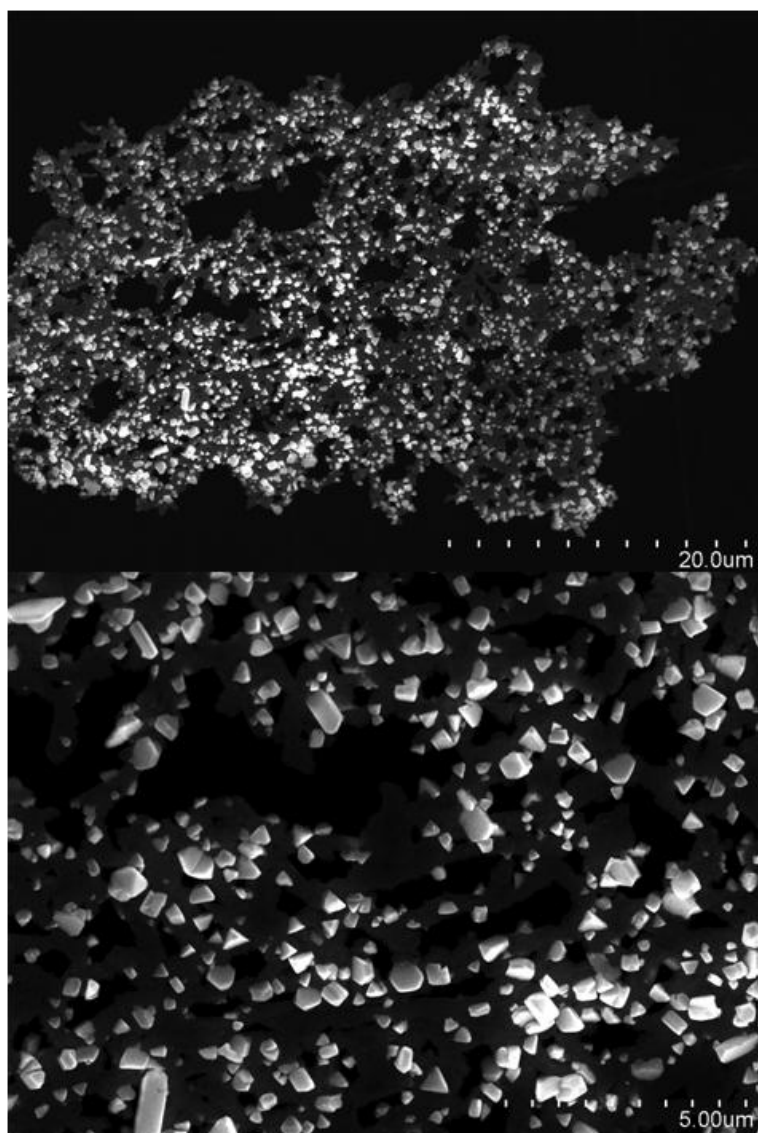

ESI Fig. 15 SEM images of CuI nanopolyhedrons on Cu superstructures.
